# Supplementary material for: Limited survival and impaired hepatic fasting metabolism in mice with constitutive Rag GTPase signaling
Source: Springer Nature journal article supplement (doi:10.1038/s41467-021-23857-8), 2021-06-16
Supplement: MOESM2 [file 41467_2021_23857_MOESM2_ESM.pdf]

## Description of Additional Supplementary Files

Title: Supplementary Data 1

Description: Proteomics dataset of liver samples from full-body RagA<sup>+/+</sup> and RagA<sup>GTP/Δ</sup> mice. Samples were collected upon overnight fasting and in *ad libitum* fed conditions.

Title: Supplementary Data 2

Description: Proteomics dataset of liver samples from Control and Li-RagA<sup>GTP/Δ</sup> mice. Samples were collected upon overnight fasting with and without refeeding.

Title: Supplementary Data 3

Description: Proteomic dataset of liver samples from fasted Control and Li-TSC1<sup>-/-</sup> mice.
